# Supplementary material for: Deep Impact of Random Amplification and Library Construction Methods on Viral Metagenomics Results
Source: PubMed Central journal article supplement (PMC7915491; doi:10.3390/v13020253), 2021-02-07

## Supplementary Materials

### Tables of contents:

#### 1) Detailed Methods

1. Reverse-transcription
2. NoAmp (non-pre-amplification method)
3. WTA (QuantiTect whole transcriptome kit (Qiagen))
4. DOPlify™ WGA (Reproductive Health Science, Thebarton, Australia)
5. Accel-NGS® 1S Plus DNA Library Kit (Swift Biosciences)
6. The stranded SMARTer technology (Takara Bio/Clontech)
7. The MATQ-seq: multiple annealing and dC-tailing-based quantitative single-cell RNA-seq
8. MALBAC Single Cell WGA kit (Yikon Genomics)
9. MALBAC-V2

#### 2) Supplementary results

Accuracy of the amplification methods

#### 3) Supplementary Tables

Table S1. Virus composition of VMRP (Viral Multiplex Reference NIBSC)

Table S2A. Virus composition of WHO Reference Virus Stocks (WRVS)

Table S2B. Quantification of WHO Reference Virus Stocks (WRVS)

Table S3. Reference viral genomes used for read mapping for WHO Reference Virus Stocks (WRVS)

Table S4: Genome fraction, weighted contigs and singletons and Ct values for each virus of VMRP in both fractions. DNA and RNA viruses are ordered by Ct values.

Table S5: DNA yields after pre-amplification of the fractions NA and RNA and total reads after quality preprocessing for VRMP diluted in plasma (1:10).

Table S6: Genome consensus length of the detected viruses in VRMP diluted in plasma (1:10) for both fractions.

Table S7: Targeted and agnostic analyses of WRVS.

#### 4) Supplementary Figures

Figure S1: Comparison of the distribution of WNCS (log<sub>10</sub>) detected in the VMRP panel for both NA and RNA fractions for seven methods. Boxes are color-coded according to the methods for both fractions.

Figure S2. Size distribution of contigs in nucleotides generated from *de novo* assembly for the seven methods.

Figure S3. Comparison of cumulative percentage of genome fractions of viruses detected in VMRP with seven methods. (A) DNA viruses in RNA and NA fractions. (B) RNA viruses in RNA and NA fractions.

Figure S4. Comparison of whole genome coverage profiles of Human parainfluenza virus 1/respirovirus 1 detected in VMRP with six methods in NA and RNA fractions.

Figure S5. Mapping of reads R1 on reference sequence Human parainfluenza virus 1 NC\_003461 from Smarter V1 (A) and NoAmp (B) of the NA fractions.

Figure S6. Comparison of genome fraction of VMRP spiked in plasma (ratio 1:10) detected in NA and in RNA fractions, by 100% cumulative bar chart.

Figure S7. Comparison of whole genome coverage profiles of five viruses WRVS spiked in plasma sample at  $10^4$  genome-copies per mL in NA fraction. For each virus, top profile: MALBAC-V2, bottom profile: NoAmp. Human gammaherpesvirus 4 (HHV-4), porcine circovirus type 1 (PCV1), human orthoreovirus type 1 (REO1), human respiratory syncytial virus strain A2 (HRSV), feline leukemia virus (FeLV), and Squirrel monkey retrovirus (SMRV).

## 1) Detailed Methods

### 1. Reverse-transcription

The reverse transcription (RT) using SuperScript® IV First-Strand cDNA Synthesis (Invitrogen) consisted in a mix with 11 µL of RNA (or total nucleic acids), 1 µL of random hexamers (50 µM), and 1 µL of dNTP (10 mM), incubated at 65°C for 5 min and cooled on ice for 2 min, according to the manufacturer's instructions. Seven µL of the RT reaction mix (1X SSIV Buffer, 5mM DTT, 2.0 U Ribonuclease Inhibitor, 10 U SuperScript™ IV Reverse Transcriptase) were added to the 13 µL of annealed RNA and incubated at 23°C for 10 min, at 50°C for 10 min, then inactivated at 80°C for 10 min. To remove RNA, 1 µL *E. coli* RNase H was added, and incubated at 37°C for 20 minutes. Single-stranded cDNA obtained with this protocol was the starting material for NoAmp, WTA, MALBAC, DOP, and Accel protocols for the RNA fraction and the total nucleic acids were also subjected to this protocol for the NA fraction.

For the experiments with WRVS, the denaturation temperature was increased to 95°C for 3 min before cooling on ice for 2 min and used with NoAmp, MALBAC and MALBAC-V2 protocols.

### 2. NoAmp

Following the reverse transcription step described in section 1, the second cDNA strand was synthesized using a mix containing 1× NEBuffer™ 2, 10 U DNA polymerase I Klenow fragment, 0.33 mM dNTPs, 20 µL of the denatured ss cDNA at 94°C for 2 min, and completed at 30 µL with DNase/RNase-free sterile water. Incubation was done at 37 °C for 1 h. Double-stranded cDNAs were purified using Agencourt AMPure beads (Beckman Coulter).

### 3. WTA (QuantiTect whole transcriptome kit (Qiagen))

Briefly, the protocol of a QuantiTect whole transcriptome kit (Qiagen) was followed, except that the cDNA synthesis step was performed with random hexamer primers and SuperScript® IV reverse transcriptase (Invitrogen) as described in section 1. The ligation step was performed on 10 µL of the RT reaction followed by the amplification step (6h) using an amplification mix (REPLI-g Midi DNA Polymerase and REPLI-g Midi Reaction Buffer). The resulting dsDNA was purified with the Agencourt AMPure beads (Beckman-Coulter), eluted in a final volume of 50 µL, and quantified with the Qubit™ DNA HS Assay (Life Technologies, Thermo Fisher Scientific Inc.).

### 4. DOPlify™ WGA (Reproductive Health Science, Thebarton, Australia)

**DOPlify™** WGA method used DOP-PCR designed for amplifying total DNA from single cells to in a two-step protocol of three hours. The kit is designed to amplify picogram quantities of DNA. In our experiments, the template for the DOPlify kit was the cDNA synthesis product (1<sup>st</sup> strand) performed as described in section 1 in a 4 µL volume as input. For the initial amplification at a low annealing temperature, 8 cycles were running. During the second stage of PCR amplification at a higher annealing temperature, 21 cycles were applied. For the viruses spiked into plasma pool, we doubled the volume input and the reaction volumes and ran two assays, either 8/21 cycles or 12/25 cycles for the successive amplifications. The resulting dsDNA was purified with the Agencourt AMPure beads (Beckman-Coulter), eluted and quantified with the Qubit™ DNA HS Assay (Life Technologies, Thermo Fisher Scientific Inc.).

### 5. Accel-NGS® 1S Plus DNA Library Kit (Swift Biosciences)

DNA fragmentation is the first step to get a peak length of 300 bp by Covaris M220 Focused-ultrasonicator using microTUBE-15 (Peak Incident power (W)=18, Duty Factor=20%, Cycles per Burst =50, Treatment time (sec)=60). Then the Adaptase step was performed on 15  $\mu$ L of fragmented DNA that simultaneously performs end repair, tailing of 3' ends, and ligation to the first truncated adapter to 3' ends in a proprietary reaction. An Extension step is used to facilitate ligation of the second truncated adapter. The synthesized strand does not get sequenced. A double bead-based SPRI clean-up is performed on the extension reaction. The Ligation reaction adds the second truncated adapter to the 5' ends and the product is cleaned-up. Dual index adapters are added and pre-assembled to the libraries for an amplification with 17 cycles of PCR. The PCR amplified libraries were cleaned-up using 0.9X AmpureXP Beads and concentrated.

#### 6. The stranded SMARTer technology (Takara Bio/Clontech)

The stranded SMARTer technology is based on tagged random hexamer primers and a SMARTScribe Reverse Transcriptase (RT) with terminal transferase activity. When it finishes the first strand cDNA synthesis, the RT adds a few non-templated nucleotides to the 3' end of the cDNA (GGG). The SMART adapter is complementary to these nucleotides and adds the 5' tag. The first strand cDNA is used as a matrix to perform the PCR amplification using indexed primers.

A depletion step targeting mammalian rRNA (16S and 28S) and mitochondrial rRNA (m12S and m16S) cut the library fragments using the Zapr enzyme and the remaining library is amplified.

The recommended quantity of RNA is 0.25–10 ng in a 8  $\mu$ L volume as input for library preparation using a SMARTer® Stranded Total RNA-Seq Kit v2 - Pico Input Mammalian (Takara Bio/Clontech). Height  $\mu$ L were used as a template with a fragmentation step and 16 cycles or 14 cycles of final RNA-seq library amplification respectively for non-spiked and spiked viruses. Advantages of the version 2 of the SMARTer Stranded Total RNA-Seq Kit version 2 over version 1 announced by the manufacturer is the more efficient removal of rRNA sequences, a higher cDNA yield, improved sequencing performance and Read 2 corresponds to the sense strand.

#### 7. The MATQ-seq: multiple annealing and dC-tailing-based quantitative single-cell RNA-seq

The full protocol is available in (Sheng and Zong, 2019). The MATQ-seq (multiple annealing and dC-tailing-based quantitative single-cell RNA-seq) assay utilizes both oligo dT but also MALBAC random primers to perform first-strand synthesis. For our comparison of methods, based on reverse transcription using random primers, we missed oligo dT. Superscript IV replaced Superscript III reverse transcriptase. To melt secondary structure, samples are incubated at 72°C for 3 min, then 10 thermal cycles of 8°C for 12 s, 15°C for 45 s, 20°C for 45 s, 30°C for 30 s, 42°C for 2 min, 50°C for 3 min, followed by 15 min at 50°C are performed to allow primers to anneal to transcripts. Primers are digested after first-strand synthesis and cDNA is released as single-stranded DNA after a RNA digestion step. The single-stranded cDNA are the polyC tailed on their 3' end using terminal transferase. MALBAC 6N3G primers bind to the PolyC tail of the single-stranded DNA during the second-strand synthesis using the Deep Vent exo-polymerase (NEB). DNA is then amplified by a 24 cycles of PCR with the GAT27PCR primer. The amplified product was then fragmented to get a peak length of 300 bp by Covaris M220 Focused-ultrasonicator using microTUBE-15 (Peak Incident power (W)=18, Duty Factor=20%, Cycles per Burst =50, Treatment time (sec)=60), then subjected to library preparation using the NEBNext Ultra II DNA Library Prep kit (NEB). The PCR amplified libraries (3 cycles) were cleaned-up using 0.9X AmpureXP Beads.

#### 8. MALBAC Single Cell WGA kit (Yikon Genomics)

MALBAC is based on multiple annealing and looping-based amplification cycles of gDNA and cDNA. The MALBAC Single Cell WGA kit (Yikon Genomics) can be used from 0.5pg of gDNA. It utilizes primers containing a 27 nucleotide common sequence and an height nucleotide variable sequence to produce fragments of amplified DNA (amplicons) during a quasi-linear pre-amplification step followed by a regular PCR step which loop back on themselves to prevent additional copying and cross-hybridization. The common nucleotide sequence is GTG AGT GAT GGT TGA GGT AGT GTG GAG. The template was the cDNA synthesis product (1<sup>st</sup> strand) performed as described in section 1 in a 5 µL volume as input. In absence of plasma matrix, the quasi-linear pre-amplification step was set on 12 cycles and the regular PCR on 21 cycles and in presence of plasma matrix, we reduced the number of cycles respectively to 8 and 17 cycles.

## 9. MALBAC-V2

The reverse transcription consisted in a mix with two MALBAC primers (**GAT27 5N3G** and **GAT27 5N3T**) at 5µM each, 0.5nM dNTP, 0.8U RNase inhibitor, 2 mM DTT and 5 µL RNA template. Samples are incubated at 95°C for 3 min and cooled on ice for 2 min. The RT reaction mix (1X SSIV Buffer, 5mM DTT, 1.2 U RNase inhibitor, 10 U SuperScript™ IV Reverse Transcriptase, Invitrogen) as added to the 7 µL of annealed RNA for a total volume of 10 µL. Then 10 thermal cycles of 8°C for 12 s, 15°C for 45 s, 20°C for 45 s, 30°C for 30 s, 42°C for 2 min, 50°C for 3 min, followed by 15 min at 50°C were performed, as in MATQ-seq protocol.

The MALBAC Single Cell WGA kit (Yikon Genomics) is used for the quasi-linear pre-amplification step and the regular amplification step. Freshly-prepared Pre-Amplification Reaction Mix (30µL) is added to 5µL of the reverse transcription product and denatured à 94°C for 3 min. The quasi-linear pre-amplification step consists in 8 to 12 thermal cycles of 20°C for 40 s, 30°C for 40 s, 40°C for 30 s, 50°C for 30 s, 60°C for 30 s, 70°C for 4 min, 95°C for 20 s, 58°C for 10 s and a cooling at 4°C. The freshly-prepared Amplification Reaction Mix (30 µL) was mixed with the 35 µL of the pre-amplified products. The thermocycler conditions are 94°C for 30 s, 17 cycles of 94°C for 20 s, 58°C for 30 s, 72°C for 3 min. The PCR product is then purified using SPRIselect Beads (Beckman Coulter), eluted in a final volume of 20 µL low TE (10 mM Tris-HCl (pH 8,0), 0,1 mM EDTA) and quantified with the Qubit™ DNA HS Assay (Life Technologies, Thermo Fisher Scientific Inc.).

|                    |                                                      |
|--------------------|------------------------------------------------------|
| <b>GAT27 5N3G:</b> | <b>GTG AGT GAT GGT TGA GGA TGT GTG GAG NNNNN GGG</b> |
| <b>GAT27 5N3T:</b> | <b>GTG AGT GAT GGT TGA GGA TGT GTG GAG NNNNN TTT</b> |
| <b>GAT27 PCR:</b>  | <b>GTG AGT GAT GGT TGA GGA TGT GTG GAG</b>           |

## 2) Supplementary results

### Accuracy of the amplification methods

The assessment of the accuracy of the methods was not the objective of our study, as we were focused on the limit of detection of viruses and did not get a high depth coverage for this purpose. Nevertheless, we indirectly estimated the accuracy of the methods using the general alignment error rate on the human genome from the plasma matrix, computed as a ratio of total collected edit distance to the number of mapped bases with Qualimap 2.2.1 on the BAM alignment (BWA MEM version 0.7.4) against the human reference genome assembly hg38 using VMRP spiked in plasma matrix. In both fractions, the range of this general error rate was between 0.36% and 0.95% for NoAmp, MALBAC, DOP and WTA, with the best result for WTA and reached 1.44%-1.94% for SMARTerV2 and 3.39%-2.08% for Accel. However this result has not been confirmed in the raw VMRP, as the nucleotide sequence alignment (MAFFT v7) of the Phosphoprotein gene of the parainfluenzavirus 1/respirovirus covered by six methods (WTA not used) (594 bp) showed identical variants compared to the reference sequence NC\_003461 in both fractions for all methods, except DOP that shared an additional variant in both fractions and another in the RNA fraction (data not shown).

## 3) Supplementary Tables

### Table S1. Virus composition of VMRP (Viral Multiplex Reference NIBSC)

| Baltimore classification | Virus Abbrev                    | Virus name /ICTV                                        | Family                  | Envelope | Genome size (kb) | PCR Ct value         | Sample origin        |
|--------------------------|---------------------------------|---------------------------------------------------------|-------------------------|----------|------------------|----------------------|----------------------|
| Group I: dsDNA           | AdV2                            | Human adenovirus 2 / Human mastadenovirus C             | <i>Adenoviridae</i>     | No       | 35.9             | 29.71                | 293 cell culture     |
|                          | AdV41                           | Human adenovirus 41 / Human mastadenovirus F            | <i>Adenoviridae</i>     | No       | 34.2             | ND                   | Clinical specimen    |
|                          | HHV-1                           | Human herpesvirus 1 / Human alphaherpesvirus 1          | <i>Herpesviridae</i>    | Yes      | 151.2            | 30.59                | MRC5 cell culture    |
|                          | HHV-2                           | Human herpesvirus 2 / Human alphaherpesvirus 2          | <i>Herpesviridae</i>    | Yes      | 154.7            | 32.48                | MRC5 cell culture    |
|                          | HHV-3                           | Human herpesvirus 3 (VZV) / Human alphaherpesvirus 3    | <i>Herpesviridae</i>    | Yes      | 124.8            | 29.02                | MeWo cell culture    |
|                          | HHV-4                           | Human herpesvirus 4 (EBV) / Human gammaherpesvirus 4    | <i>Herpesviridae</i>    | Yes      | 171.7            | 31.27                | B95-8 cell culture   |
|                          | HHV-5                           | Human herpesvirus 5 (CMV) / Human betaherpesvirus 5     | <i>Herpesviridae</i>    | Yes      | 233.7            | 28.95                | MRC5 cell culture    |
| Group II: ssDNA          | B19                             | Human parvovirus B19 / Human erythrovirus B19           | <i>Parvoviridae</i>     | No       | 5.6              | 24                   | Plasma               |
| Group III: dsRNA         | RVA                             | Rotavirus A                                             | <i>Reoviridae</i>       | No       | 18.5             | 24.49                | Clinical specimen    |
| Group IV: ssRNA (+)      | AstV                            | Human astrovirus / Human astrovirus 1                   | <i>Astroviridae</i>     | No       | 6.8              | 30.53                | Clinical specimen    |
|                          | NV_GI                           | Norovirus GI                                            | <i>Caliciviridae</i>    | No       | 7.6              | ND                   | Clinical specimen    |
|                          | NV_GII                          | Norovirus GII                                           | <i>Caliciviridae</i>    | No       | 7.5              | ND                   | Clinical specimen    |
|                          | SaV                             | Sapovirus                                               | <i>Caliciviridae</i>    | No       | 7.5              | 33.37                | Clinical specimen    |
|                          | CoV_229E                        | Human coronavirus 229E                                  | <i>Coronaviridae</i>    | Yes      | 27.2             | ND                   | MRC5 cell culture    |
|                          | CVB4                            | Human Coxsackievirus B4 / Enterovirus B                 | <i>Picomaviridae</i>    | No       | 7.4              | 30.72                | Hep-2 cell culture   |
|                          | HRV_A39                         | Rhinovirus A39 / Enterovirus A                          | <i>Picomaviridae</i>    | No       | 7.1              | 31.16                | MRC5 cell culture    |
| HPeV3                    | Parechovirus 3 / Parechovirus A | <i>Picomaviridae</i>                                    | No                      | 7.2      | 29.35            | LLC-MK2 cell culture |                      |
| Group V: ssRNA (-)       | IFVA_H1N1                       | Influenza A virus H1N1                                  | <i>Orthomyxoviridae</i> | Yes      | 13.2             | 32.02                | Egg passage          |
|                          | IFVA_H3N2                       | Influenza A virus H3N2                                  | <i>Orthomyxoviridae</i> | Yes      | 13.6             | ND                   | Egg passage          |
|                          | IFVB                            | Influenza B virus                                       | <i>Orthomyxoviridae</i> | Yes      | 14.2             | ND                   | Egg passage          |
|                          | PIV1                            | Human parainfluenza virus 1 / Human respirovirus 1      | <i>Paramyxoviridae</i>  | Yes      | 15.5             | 34.43                | PRF5 cell culture    |
|                          | PIV2                            | Human parainfluenza virus 2 / Human rubulavirus 2       | <i>Paramyxoviridae</i>  | Yes      | 15.7             | 33.87                | PRF5 cell culture    |
|                          | PIV3                            | Human parainfluenza virus 3 / Human respirovirus 3      | <i>Paramyxoviridae</i>  | Yes      | 15.4             | ND                   | PRF5 cell culture    |
|                          | PIV4                            | Human parainfluenza virus 4 / Human rubulavirus 4       | <i>Paramyxoviridae</i>  | Yes      | 13.3             | 31.83                | PRF5 cell culture    |
|                          | HMPV_A                          | Metapneumovirus A / Human metapneumovirus               | <i>Pneumoviridae</i>    | Yes      | 17.4             | 31.86                | LLC-MK2 cell culture |
|                          | RSV_A2                          | Respiratory syncytial virus A2 / Human orthopneumovirus | <i>Pneumoviridae</i>    | Yes      | 15.2             | 34.33                | Hep-2 cell culture   |

ND: not detected

Table S2A. Virus composition of WHO Reference Virus Stocks (WRVS)

| Virus | Family                   | virus ATCC                                    | strain                                      | Particle size (nm) | Genome size (kb) | Genome topology       | Envelope | Physical-chemical resistance |
|-------|--------------------------|-----------------------------------------------|---------------------------------------------|--------------------|------------------|-----------------------|----------|------------------------------|
| HHV-4 | <i>Herpesviridae</i>     | Epstein-Barr virus (EBV) /Human herpesvirus 4 | strain B95-8 (ATCC ID number SC-VR-6004P)   | 122-180            | 180              | ds-DNA /circular      | yes      | low to medium                |
| FeLV  | <i>Orthoretrovirinae</i> | feline leukemia virus                         | strain Thielen (ATCC ID number SC-VR-6002P) | 80-100             | 8,448            | ss-RNA(+) /dimeric    | yes      | low                          |
| HRSV  | <i>Paramyxoviridae</i>   | human respiratory syncytial virus             | strain A2 (ATCC ID number SC-VR-6003P)      | 150-300            | 15,158           | ss-RNA (-) /linear    | yes      | low to medium                |
| REO1  | <i>Reoviridae</i>        | human orthoreovirus type 1                    | strain Lang (ATCC ID number SC-VR-6001P)    | 60-80              | 23,5             | ds-RNA /segmented(10) | no       | medium to high               |
| PCV1  | <i>Circoviridae</i>      | porcine circovirus type 1                     | ATCC ID number SC-VR-6000P                  | 16-18              | 1,759            | ss-DNA /circular      | no       | high                         |

Table S2B. Quantification of WHO Reference Virus Stocks (WRVS)

| Virus | virus ATCC                        | infectious virus titer TCID50/mL | genome copy number using digital drop PCR (provided by ATCC). (genome copies/mL) | Ratio genome copies per TCID50/mL |
|-------|-----------------------------------|----------------------------------|----------------------------------------------------------------------------------|-----------------------------------|
| HHV-4 | Epstein-Barr virus (HHV-4)        | 1,10E+07                         | 3,70E+08                                                                         | 3,36E+01                          |
| FeLV  | feline leukemia virus             | 2,30E+07                         | 5,30E+10                                                                         | 2,30E+03                          |
| HRSV  | human respiratory syncytial virus | 1,10E+06                         | 1,00E+09                                                                         | 9,09E+02                          |
| REO1  | human orthoreovirus type 1        | 1,10E+10                         | 2,40E+09                                                                         | 2,18E-01                          |
| PCV1  | porcine circovirus type 1         | 1,20E+07                         | 2,70E+11                                                                         | 2,25E+04                          |

Table S3. Reference viral genomes used for read mapping for WHO Reference Virus Stocks (WRVS)

| Virus/Gene | Virus genome length (bp) | Genbank accession number |
|------------|--------------------------|--------------------------|
| REO1/ L1   | 3,854                    | M24734.1                 |
| REO1/ L2   | 3,915                    | AF378003.1               |
| REO1/ L3   | 3,901                    | AF129820.1               |
| REO1/ M1   | 2,304                    | AF461682.1               |
| REO1/ M2   | 2,203                    | AF490617.1               |
| REO1/ M3   | 2,241                    | AF174382.1               |
| REO1/ S1   | 1,458                    | M10260.1                 |
| REO1/ S2   | 1,331                    | L19774.1                 |
| REO1/ S3   | 1,198                    | M18389.1                 |
| REO1/ S4   | 1,196                    | X61586.1                 |



|      |         |             |
|------|---------|-------------|
| RSV  | 15,158  | JF920069    |
| FeLV | 8,448   | NC_001940.1 |
| EBV  | 172,281 | V01555      |
| PCV1 | 1,758   | NC_001792.2 |
| SMRV | 8,785   | M23385      |

Table S4: Genome fraction, weighted contigs and singletons and Ct values for each virus of VMRP in both fractions. DNA and RNA viruses are ordered by Ct values.

| Viruses   |             | genome fraction (%) |       |        |         |       |       |           | Weighted contigs + singletons |        |         |         |        |        |           | PCR Ct value |
|-----------|-------------|---------------------|-------|--------|---------|-------|-------|-----------|-------------------------------|--------|---------|---------|--------|--------|-----------|--------------|
| Fractions | DNA viruses | NoAmp               | WTA   | MALBAC | DOPlify | MATQ  | Accel | SMARTerV1 | NoAmp                         | WTA    | MALBAC  | DOPlify | MATQ   | Accel  | SMARTerV1 |              |
| NA        | B19         | 98,78               | 93,78 | 85,01  | 82,65   | 87,10 | 89,47 | 13,24     | 585497                        | 127043 | 1318518 | 1E+06   | 1E+06  | 48966  | 1779      | 24,00        |
| RNA       | B19         | 16,71               | 8,02  | 0      | 11,29   | 40,78 | 0     | 0         | 9210                          | 1323   | 0       | 1254    | 13005  | 0      | 0         | 24,00        |
| NA        | CMV         | 83,74               | 3,75  | 55,67  | 23,58   | 23,79 | 25,68 | 9,63      | 1E+06                         | 355030 | 2,2E+07 | 2E+06   | 3E+06  | 71013  | 35382     | 28,95        |
| RNA       | CMV         | 0,47                | 1,33  | 0      | 0       | 0,58  | 0     | 0,02      | 1416                          | 5087   | 0       | 0       | 3546   | 0      | 0         | 28,95        |
| NA        | VZV         | 99,98               | 49,13 | 97,49  | 93,08   | 88,92 | 92,22 | 47,63     | 4E+06                         | 2E+06  | 2,8E+07 | 1E+07   | 1E+07  | 557412 | 168597    | 29,02        |
| RNA       | VZV         | 2,77                | 10,70 | 0      | 2,23    | 10,06 | 0     | 0         | 4482                          | 25117  | 0       | 3574    | 30065  | 0      | 0         | 29,02        |
| NA        | AdV2        | 99,95               | 6,40  | 77,17  | 59,38   | 42,15 | 40,45 | 22,92     | 386512                        | 128871 | 7428519 | 1E+06   | 1E+06  | 17730  | 10926     | 29,71        |
| RNA       | AdV2        | 2,47                | 2,39  | 0      | 0,45    | 2,76  | 0     | 0,30      | 0                             | 1662   | 0       | 312     | 0      | 0      | 0         | 29,71        |
| NA        | HHV1        | 59,48               | 0,11  | 7,96   | 0,50    | 5,81  | 4,74  | 2,55      | 532029                        | 4320   | 3059492 | 46670   | 2E+06  | 9855   | 8508      | 30,59        |
| RNA       | HHV1        | 0                   | 0     | 0      | 0       | 0     | 0     | 0         | 0                             | 609    | 0       | 0       | 0      | 0      | 0         | 30,59        |
| NA        | EBV         | 46,80               | 1,05  | 51,57  | 14,67   | 13,14 | 7,34  | 2,70      | 184992                        | 5954   | 1,5E+07 | 608215  | 1E+06  | 11718  | 4422      | 31,27        |
| RNA       | EBV         | 0                   | 0,56  | 0      | 0       | 0,67  | 0     | 0,04      | 0                             | 1014   | 0       | 0       | 1167   | 0      | 0         | 31,27        |
| NA        | HHV2        | 75,03               | 0,11  | 5,17   | 0,97    | 7,64  | 7,89  | 2,51      | 552237                        | 2161   | 1350780 | 2745    | 1E+06  | 8598   | 4293      | 32,48        |
| RNA       | HHV2        | 0                   | 0,80  | 0      | 0       | 0,14  | 0     | 0         | 0                             | 1698   | 0       | 0       | 693    | 0      | 0         | 32,48        |
| NA        | AdV41       | 20,69               | 0     | 2,01   | 0       | 0     | 1,92  | 1,32      | 16371                         | 0      | 671494  | 0       | 12942  | 345    | 567       | ND           |
| RNA       | AdV41       | 0                   | 0     | 0      | 0       | 0     | 0     | 0         | 0                             | 0      | 0       | 0       | 0      | 0      | 0         | ND           |
| Viruses   |             | genome fraction (%) |       |        |         |       |       |           | Weighted contigs + singletons |        |         |         |        |        |           | PCR Ct value |
| Fractions | RNA viruses | No Amp              | WTA   | MALBAC | DOPlify | MATQ  | Accel | SMARTerV1 | NoAmp                         | WTA    | MALBAC  | DOPlify | MATQ   | Accel  | SMARTerV1 |              |
| NA        | RVA         | 34,86               | 1,61  | 1,70   | 1,47    | 37,11 | 8,45  | 70,03     | 107517                        | 486    | 612     | 8058    | 685016 | 1419   | 329512    | 24,49        |
| RNA       | RVA         | 63,65               | 9,83  | 13,52  | 22,55   | 98,97 | 42,66 | 85,86     | 78403                         | 22164  | 376596  | 350260  | 4E+07  | 20772  | 937325    | 24,49        |
| NA        | HPeV3       | 96,69               | 14,14 | 92,56  | 63,74   | 97,24 | 69,49 | 62,19     | 166846                        | 9156   | 1399692 | 281515  | 2E+06  | 5175   | 15090     | 29,35        |
| RNA       | HPeV3       | 95,10               | 4,35  | 79,75  | 60,78   | 94,86 | 47,57 | 69,07     | 77122                         | 642    | 747603  | 284627  | 914471 | 3093   | 4407      | 29,35        |
| NA        | AstV        | 2,24                | 0     | 0      | 0       | 19,51 | 2,17  | 1,00      | 300                           | 0      | 0       | 0       | 48487  | 72     | 276       | 30,53        |
| RNA       | AstV        | 0                   | 0     | 5,61   | 0       | 16,04 | 0     | 0         | 0                             | 0      | 47838   | 0       | 2100   | 0      | 0         | 30,53        |
| NA        | CVB4        | 38,33               | 10,03 | 29,35  | 10,91   | 30,40 | 6,21  | 9,71      | 8757                          | 2160   | 207837  | 68223   | 78477  | 429    | 189       | 30,72        |
| RNA       | CVB4        | 17,60               | 0     | 13,22  | 0       | 24,71 | 2,97  | 3,46      | 1008                          | 0      | 3105    | 0       | 246168 | 0      | 0         | 30,72        |
| NA        | HRV_A39     | 11,36               | 0     | 0      | 9,86    | 27,01 | 7,16  | 6,00      | 546                           | 0      | 0       | 13815   | 1884   | 570    | 210       | 31,16        |
| RNA       | HRV_A39     | 6,64                | 0     | 3,99   | 4,30    | 16,14 | 1,96  | 1,75      | 690                           | 0      | 423     | 37923   | 112728 | 0      | 276       | 31,16        |
| NA        | PIV4        | 99,61               | 1,36  | 76,53  | 56,58   | 97,33 | 90,48 | 64,98     | 323775                        | 288    | 3002924 | 685379  | 3E+06  | 71181  | 36525     | 31,83        |
| RNA       | PIV4        | 97,76               | 5,39  | 61,03  | 50,23   | 93,26 | 85,80 | 67,39     | 176686                        | 1326   | 1279353 | 419603  | 5E+06  | 25086  | 35325     | 31,83        |
| NA        | HMPV_A      | 10,86               | 0     | 0      | 1,05    | 9,55  | 16,00 | 15,07     | 37100                         | 0      | 0       | 116685  | 33712  | 4329   | 4155      | 31,86        |
| RNA       | HMPV_A      | 8,02                | 0     | 0      | 0,97    | 9,00  | 12,24 | 15,88     | 3024                          | 0      | 0       | 24672   | 200442 | 2577   | 10200     | 31,86        |
| NA        | IFVA_H1N1   | 6,83                | 0     | 0      | 0       | 8,70  | 0     | 4,78      | 3669                          | 0      | 0       | 0       | 61832  | 0      | 1467      | 32,02        |
| RNA       | IFVA_H1N1   | 4,95                | 0     | 0      | 0       | 12,35 | 1,63  | 3,19      | 180                           | 0      | 0       | 0       | 489958 | 0      | 138       | 32,02        |
| NA        | SaV         | 70,78               | 0     | 56,84  | 20,69   | 79,47 | 21,31 | 16,92     | 244002                        | 10660  | 3738950 | 535891  | 3E+06  | 30672  | 20622     | 33,37        |
| RNA       | SaV         | 41,47               | 0     | 57,15  | 17,24   | 66,35 | 15,67 | 25,33     | 125172                        | 2268   | 2871744 | 390263  | 8E+06  | 19653  | 48126     | 33,37        |
| NA        | PIV2        | 71,87               | 0     | 42,77  | 16,99   | 76,38 | 39,31 | 31,56     | 47874                         | 0      | 1160043 | 199624  | 1E+06  | 9096   | 10233     | 33,87        |
| RNA       | PIV2        | 60,72               | 0,81  | 24,13  | 25,30   | 58,34 | 34,86 | 31,31     | 31476                         | 246    | 301161  | 388379  | 2E+06  | 9642   | 20715     | 33,87        |
| NA        | RSV_A2      | 8,64                | 0     | 0,00   | 3,23    | 12,36 | 9,26  | 10,97     | 3822                          | 0      | 98406   | 447     | 8488   | 996    | 1233      | 34,33        |
| RNA       | RSV_A2      | 3,00                | 0     | 0      | 3,52    | 4,50  | 8,49  | 8,06      | 0                             | 0      | 0       | 61563   | 4128   | 846    | 948       | 34,33        |
| NA        | PIV1        | 98,23               | 1,58  | 87,35  | 66,72   | 97,02 | 87,13 | 69,65     | 542099                        | 468    | 3267668 | 1E+06   | 2E+06  | 72528  | 69579     | 34,43        |
| RNA       | PIV1        | 95,51               | 13,22 | 75,60  | 71,13   | 93,21 | 76,69 | 70,83     | 258170                        | 3693   | 2286864 | 1E+06   | 8E+06  | 61248  | 129702    | 34,43        |
| NA        | PIV3        | 6,42                | 0     | 12,03  | 3,00    | 8,61  | 2,28  | 0         | 8927                          | 0      | 400217  | 2079    | 857181 | 726    | 132       | ND           |
| RNA       | PIV3        | 8,81                | 0     | 1,04   | 4,32    | 3,64  | 4,16  | 0,47      | 3540                          | 0      | 5190    | 73653   | 424034 | 1347   | 0         | ND           |
| NA        | CoV_229E    | 1,15                | 0     | 0      | 0       | 0     | 0     | 0,15      | 630                           | 0      | 0       | 0       | 0      | 0      | 0         | ND           |
| RNA       | CoV_229E    | 0                   | 0     | 0      | 0       | 0     | 0     | 0         | 0                             | 0      | 0       | 0       | 0      | 0      | 0         | ND           |
| NA        | IFVA_H3N2   | 0                   | 0     | 0      | 0       | 0,59  | 0     | 1,73      | 0                             | 0      | 0       | 0       | 0      | 0      | 50        | ND           |
| RNA       | IFVA_H3N2   | 0                   | 0     | 0      | 0       | 0     | 0,51  | 0         | 0                             | 0      | 0       | 0       | 102    | 0      | 0         | ND           |
| NA        | IFVB        | 0,57                | 0     | 0      | 0       | 0     | 0     | 2,74      | 162                           | 0      | 0       | 0       | 22     | 0      | 555       | ND           |
| RNA       | IFVB        | 0                   | 0     | 0      | 0       | 0     | 0     | 3,13      | 0                             | 0      | 0       | 0       | 153    | 0      | 1101      | ND           |
| NA        | NV_GI       | 0                   | 0     | 0      | 0       | 0     | 0     | 0         | 0                             | 0      | 0       | 0       | 0      | 0      | 0         | ND           |
| RNA       | NV_GI       | 0                   | 0     | 0      | 0       | 0     | 0     | 0         | 0                             | 0      | 0       | 0       | 0      | 0      | 0         | ND           |
| NA        | NV_GII      | 0                   | 0     | 0      | 0       | 0     | 0     | 0         | 684                           | 0      | 0       | 0       | 0      | 0      | 0         | ND           |
| RNA       | NV_GII      | 0                   | 0     | 0      | 0       | 0     | 0     | 0         | 0                             | 0      | 0       | 0       | 0      | 0      | 0         | ND           |

Table S5: DNA yields after pre-amplification of the fractions NA and RNA and total reads after quality preprocessing for VRMP diluted in plasma (1:10).

| VMRP+Plasma         | Input NA or RNA (µL) | Qubit DNA (ng) after pre-amplification | total reads PE |
|---------------------|----------------------|----------------------------------------|----------------|
| <b>Fraction NA</b>  |                      |                                        |                |
| NoAmp               | 11                   | 14                                     | 47,533,260     |
| WTA                 | 5                    | 2500                                   | 24,488,418     |
| MALBAC <sup>1</sup> | 5                    | 79,8                                   | 35,553,024     |
| DOPlify1*           | 8                    | 204                                    | 24,475,408     |
| DOPlify2*           | 8                    | 98,4                                   | 31,465,452     |
| Accel               | 8                    | Not applicable                         | 31,688,834     |
| SMARTer V2          | 8                    | Not applicable                         | 17,243,974     |
| SD                  |                      |                                        | 9,712,616      |
| <b>Fraction RNA</b> |                      |                                        |                |
| NoAmp               | 11                   | 26,6                                   | 14,252,900     |
| WTA                 | 5                    | 1024                                   | 17,604,150     |
| MALBAC              | 5                    | 64,8                                   | 22,732,152     |
| DOPlify1*           | 8                    | 62,6                                   | 34,062,016     |
| DOPlify2*           | 8                    | 56                                     | 30,467,000     |
| Accel               | 8                    | Not applicable                         | 27,285,343     |
| SMARTer V2          | 8                    | Not applicable                         | 21,368,064     |
| SD                  |                      |                                        | 7,051,001      |
|                     |                      |                                        |                |
| MALBAC <sup>1</sup> |                      | 8/17 cycles                            |                |
| DOPlify1*           |                      | 12/25 cycles                           |                |
| DOPlify2*           |                      | 8/21 cycles                            |                |

Table S6: Genome consensus length of the detected viruses in VRMP diluted in plasma (1:10) for both fractions.

| Virus     | Reference length (bp) |                      | Consensus length (bp) |           |        |         |           |            |             |              |             |              |               |                |          |           |   |  |
|-----------|-----------------------|----------------------|-----------------------|-----------|--------|---------|-----------|------------|-------------|--------------|-------------|--------------|---------------|----------------|----------|-----------|---|--|
|           | Method                | Fractions: NA or RNA | NoAmp NA              | NoAmp RNA | WTA NA | WTA RNA | MALBAC NA | MALBAC RNA | DOPlify1 NA | DOPlify1 RNA | DOPlify2 NA | DOPlify2 RNA | SMARTer V2 NA | SMARTer V2 RNA | Accel NA | Accel RNA |   |  |
| AdV2      |                       | 35937                | 4137                  | 2054      | 0      | 0       | 791       | 0          | 359         | 0            | 0           | 0            | 0             | 0              | 0        | 377       | 0 |  |
| AdV41     |                       | 34138                | 367                   | 0         | 0      | 0       | 0         | 0          | 0           | 0            | 0           | 0            | 0             | 254            | 0        | 0         | 0 |  |
| HHV-1     |                       | 152261               | 856                   | 440       | 0      | 0       | 0         | 128        | 106         | 225          | 0           | 0            | 0             | 0              | 617      | 149       | 0 |  |
| HHV-2     |                       | 154675               | 379                   | 0         | 0      | 0       | 0         | 0          | 0           | 0            | 0           | 0            | 0             | 0              | 106      | 0         | 0 |  |
| HHV-3     |                       | 124884               | 5367                  | 264       | 268    | 235     | 9510      | 334        | 600         | 268          | 11638       | 374          | 0             | 0              | 1043     | 230       | 0 |  |
| HHV-4     |                       | 172764               | 2418                  | 108       | 0      | 0       | 5171      | 0          | 348         | 0            | 93          | 0            | 759           | 0              | 511      | 0         | 0 |  |
| HHV-5     |                       | 235646               | 5108                  | 639       | 0      | 0       | 5810      | 0          | 2124        | 0            | 687         | 0            | 1443          | 0              | 1239     | 0         | 0 |  |
| B19       |                       | 5596                 | 5483                  | 506       | 3685   | 212     | 4571      | 392        | 4093        | 148          | 4338        | 497          | 691           | 0              | 3871     | 212       | 0 |  |
| RVA       |                       | 18038                | 956                   | 1772      | 0      | 0       | 0         | 0          | 0           | 0            | 0           | 0            | 8977          | 9062           | 532      | 2040      | 0 |  |
| AstV      |                       | 6771                 | 144                   | 0         | 0      | 0       | 0         | 0          | 0           | 0            | 631         | 0            | 0             | 310            | 0        | 0         | 0 |  |
| NV_GI     |                       | 7654                 | 0                     | 0         | 0      | 0       | 0         | 0          | 0           | 0            | 0           | 0            | 0             | 0              | 0        | 0         | 0 |  |
| NV_GII    |                       | 7567                 | 0                     | 0         | 0      | 0       | 0         | 0          | 0           | 0            | 0           | 0            | 0             | 0              | 0        | 0         | 0 |  |
| SaV       |                       | 7429                 | 2925                  | 1278      | 0      | 0       | 2908      | 881        | 366         | 212          | 530         | 106          | 1107          | 1194           | 2231     | 204       | 0 |  |
| CoV_229E  |                       | 27317                | 0                     | 0         | 0      | 0       | 0         | 0          | 0           | 0            | 0           | 0            | 0             | 0              | 0        | 0         | 0 |  |
| CVB4      |                       | 7397                 | 1374                  | 1068      | 0      | 0       | 462       | 274        | 417         | 929          | 1165        | 0            | 439           | 495            | 203      | 101       | 0 |  |
| HRV_A39   |                       | 7137                 | 635                   | 192       | 0      | 0       | 0         | 0          | 0           | 0            | 0           | 0            | 0             | 0              | 0        | 0         | 0 |  |
| HPeV3     |                       | 7349                 | 3210                  | 1874      | 0      | 0       | 2124      | 106        | 894         | 0            | 184         | 0            | 1171          | 0              | 1329     | 203       | 0 |  |
| IFVA_H1N1 |                       | 13588                | 0                     | 0         | 0      | 0       | 0         | 0          | 0           | 0            | 0           | 0            | 0             | 0              | 0        | 0         | 0 |  |
| IFVA_H3N2 |                       | 13627                | 0                     | 0         | 0      | 0       | 0         | 0          | 0           | 0            | 0           | 0            | 0             | 0              | 0        | 0         | 0 |  |
| IFVB      |                       | 14452                | 0                     | 0         | 0      | 0       | 0         | 0          | 0           | 0            | 0           | 0            | 0             | 0              | 0        | 0         | 0 |  |
| PIV1      |                       | 15600                | 217                   | 0         | 0      | 0       | 652       | 304        | 0           | 106          | 106         | 106          | 0             | 0              | 0        | 0         | 0 |  |
| PIV2      |                       | 15646                | 0                     | 0         | 0      | 0       | 0         | 0          | 0           | 0            | 0           | 0            | 0             | 0              | 0        | 0         | 0 |  |
| PIV3      |                       | 15409                | 0                     | 0         | 0      | 0       | 0         | 0          | 0           | 0            | 0           | 0            | 0             | 0              | 0        | 0         | 0 |  |
| PIV4      |                       | 17304                | 106                   | 0         | 0      | 0       | 381       | 0          | 0           | 211          | 105         | 105          | 0             | 0              | 0        | 102       | 0 |  |
| HMPV_A    |                       | 13251                | 0                     | 0         | 0      | 0       | 0         | 0          | 0           | 0            | 0           | 0            | 0             | 0              | 0        | 0         | 0 |  |
| RSV_A2    |                       | 15191                | 0                     | 0         | 0      | 0       | 0         | 0          | 0           | 0            | 0           | 0            | 0             | 0              | 0        | 0         | 0 |  |

Table S7: Targeted and agnostic analyses of WRVS: Total viral read count, genome fraction; average coverage for the targeted approach and WNCS for the agnostic approach.

| Analysis | Targeted approach        |                           |                          |                           |                          |                           | Agnostic approach        |                           |
|----------|--------------------------|---------------------------|--------------------------|---------------------------|--------------------------|---------------------------|--------------------------|---------------------------|
| Methods  | NoAmp<br>10,000<br>gc/mL | MALBAC-V2<br>10,000 gc/mL | NoAmp<br>10,000<br>gc/mL | MALBAC-V2<br>10,000 gc/mL | NoAmp<br>10,000<br>gc/mL | MALBAC-V2<br>10,000 gc/mL | NoAmp<br>10,000<br>gc/mL | MALBAC-V2<br>10,000 gc/mL |
| Virus    | Total read count (R1)    |                           | Genome fraction (%)      |                           | Average coverage         |                           | WNCS                     |                           |
| HHV-4    | 2062                     | 2571                      | 74.29                    | 65.57                     | 1.63                     | 2.61                      | 260355                   | 9764774                   |
| PCV1     | 22                       | 96                        | 63.77                    | 86.06                     | 1.65                     | 9.73                      | 1557                     | 12450                     |
| REO1     | 5810                     | 5644                      | 95.98                    | 95.36                     | 35.10                    | 42.59                     | 620357                   | 1944510                   |
| HRSV     | 146                      | 208                       | 71.63                    | 47.49                     | 1.38                     | 2.31                      | 10134                    | 213123                    |
| FeLV     | 104                      | 147                       | 66.96                    | 70.02                     | 1.67                     | 2.91                      | 10254                    | 359760                    |
| SMRV     | 1516                     | 1381                      | 97.73                    | 98.29                     | ND                       | ND                        | 195381                   | 864080                    |
|          |                          |                           |                          |                           |                          |                           |                          |                           |
| Methods  | NoAmp<br>1000 gc/mL      | MALBAC-V2<br>1000 gc/mL   | NoAmp<br>1000 gc/mL      | MALBAC-V2<br>1000 gc/mL   | NoAmp<br>1000 gc/mL      | MALBAC-V2<br>1000 gc/mL   | NoAmp<br>1000 gc/mL      | MALBAC-V2<br>1000 gc/mL   |
| Virus    | Total read count (R1)    |                           | Genome fraction (%)      |                           | Average coverage         |                           | WNCS                     |                           |
| HHV-4    | 154                      | 219                       | 5.94                     | 11.67                     | 0.10                     | 0.17                      | 7731                     | 357273                    |
| PCV1     | 1                        | 10                        | 16.95                    | 60.07                     | 0.17                     | 0.84                      | 291                      | 166539                    |
| REO1     | 706                      | 2272                      | 89.26                    | 87.87                     | 6.37                     | 16.50                     | 141138                   | 1393055                   |
| HRSV     | 1                        | 4                         | 0.23                     | 1.87                      | 0.00                     | 0.02                      | 0                        | 108                       |
| FeLV     | 0                        | 13                        | 0                        | 3.60                      | 0                        | 0.10                      | 0                        | 2134                      |
| SMRV     | 2                        | 53                        | 4.54                     | 53.30                     | ND                       | ND                        | 455                      | 132948                    |
|          |                          |                           |                          |                           |                          |                           |                          |                           |
| Methods  | NoAmp<br>100 gc/mL       | MALBAC-V2<br>100 gc/mL    | NoAmp<br>100 gc/mL       | MALBAC-V2<br>100 gc/mL    | NoAmp<br>100 gc/mL       | MALBAC-V2<br>100 gc/mL    | NoAmp<br>100 gc/mL       | MALBAC-V2<br>100 gc/mL    |
| Virus    | Total read count (R1)    |                           | Genome fraction (%)      |                           | Average coverage         |                           | WNCS                     |                           |
| HHV-4    | 147                      | 183                       | 0.87                     | 2.30                      | 0.050                    | 0.059                     | 225                      | 2559                      |
| PCV1     | 1                        | 0                         | 1.37                     | 0                         | 0.013                    | 0                         | 0                        | 0                         |
| REO1     | 49                       | 130                       | 32.44                    | 41.40                     | 0.460                    | 0.998                     | 5100                     | 296666                    |
| HRSV     | 4                        | 2                         | 3.75                     | 0.35                      | 0.052                    | 0.004                     | 330                      | 0                         |
| FeLV     | 3                        | 17                        | 4.24                     | 8.77                      | 0.042                    | 0.172                     | 129                      | 75357                     |
| SMRV     | 10                       | 19                        | 14.96                    | 24.34                     | ND                       | ND                        | 2781                     | 136761                    |

Supplementary Figures

Figure S1: Comparison of the distribution of WNCS (log10) detected in the VMRP panel for both NA and RNA fractions for seven methods. Boxes are color-coded according to the methods for both fractions. Boxes represent the interquartile range, bar the median value, and circles the outliers.

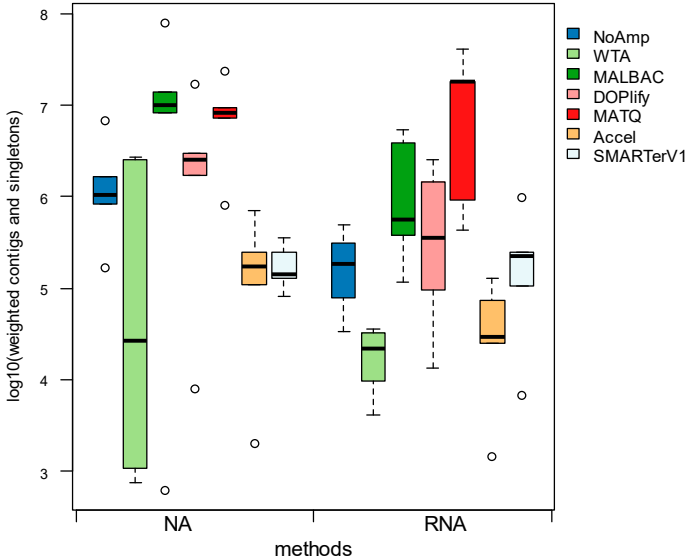

**Figure S2.** Size distribution of contigs in nucleotides generated from *de novo* assembly for the seven methods. Boxes represent the interquartile range, bar the median value, and dots the outliers.

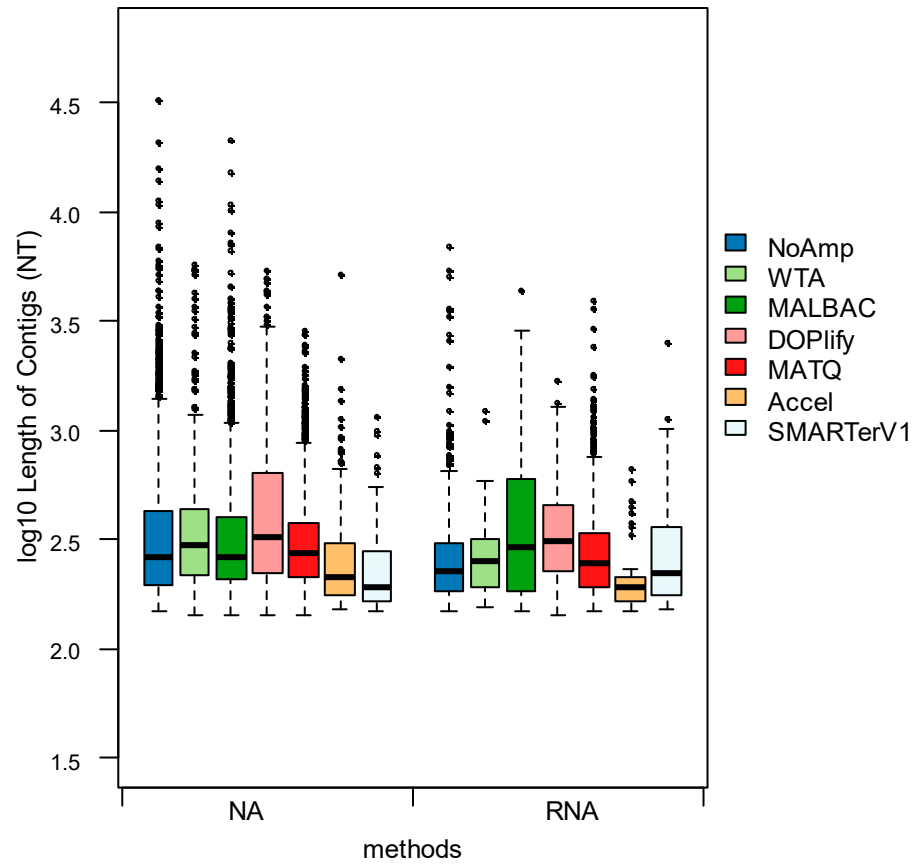

**Figure S3.** Comparison of cumulative percentage of genome fractions of viruses detected in VMRP with seven methods. **(A)** DNA viruses in RNA and NA fractions. **(B)** RNA viruses in RNA and NA fractions.

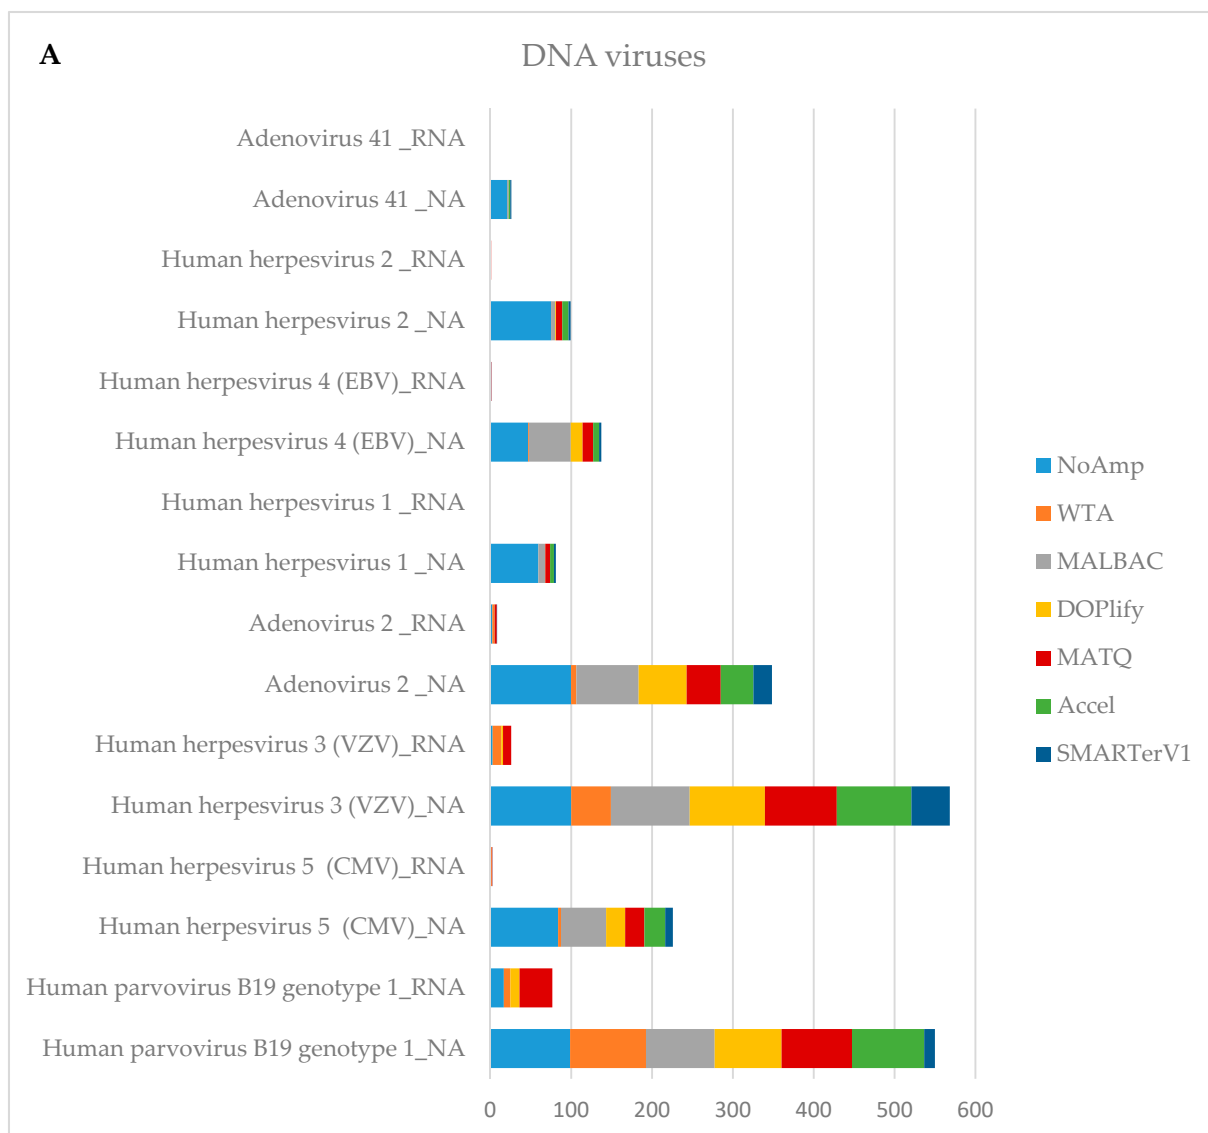



**B**

## RNA viruses

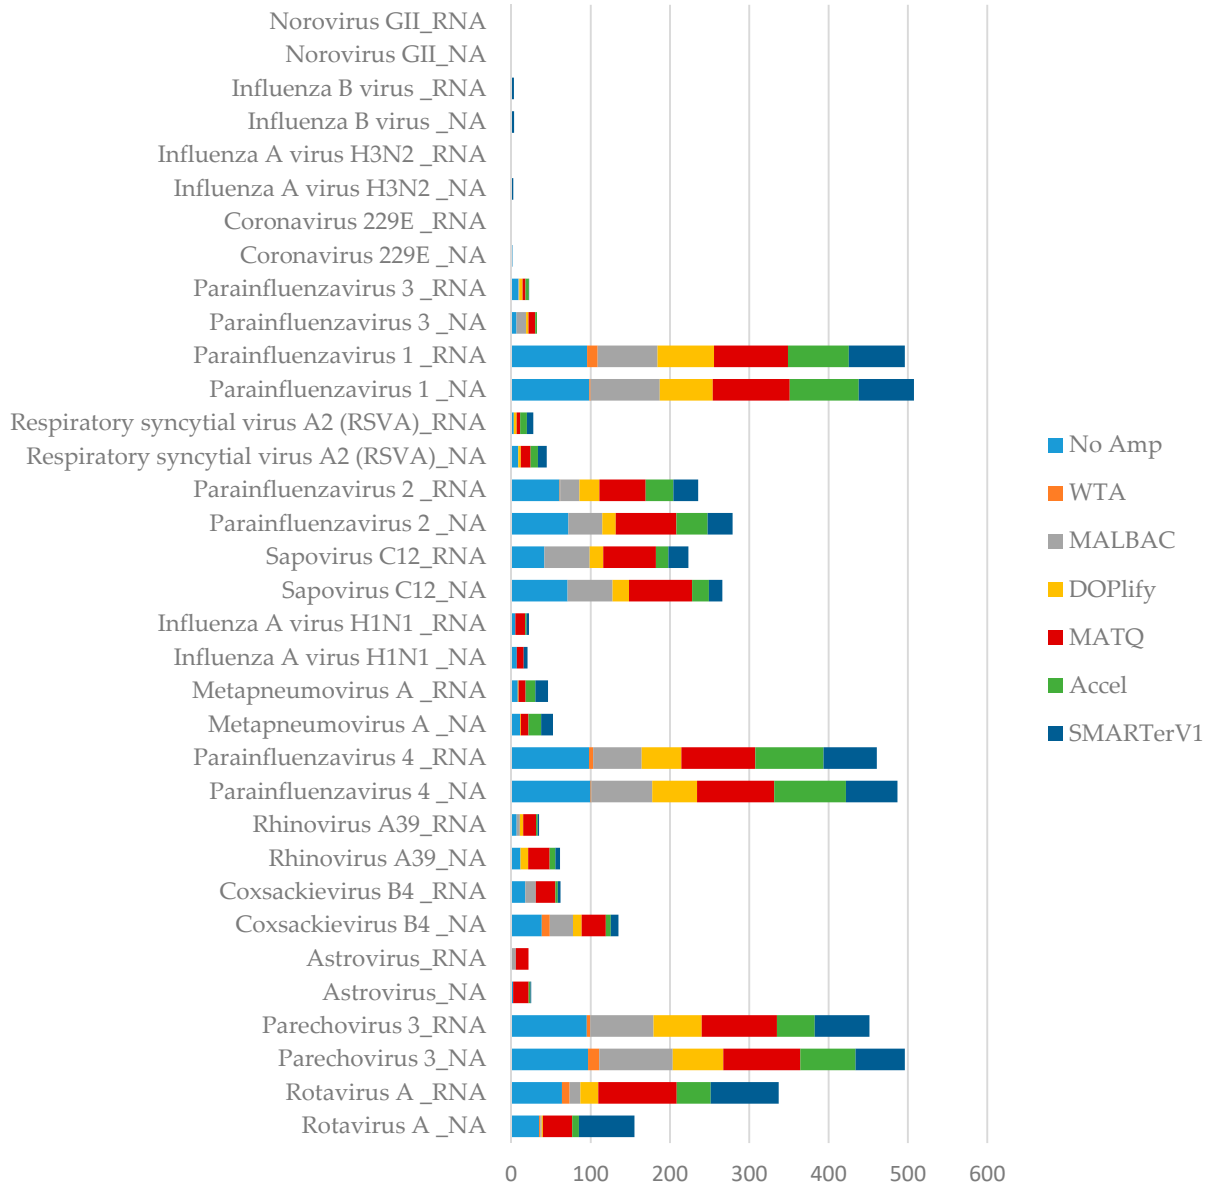

**Figure S4.** Comparison of whole genome coverage profiles of Human parainfluenza virus 1/respirovirus 1 detected in VMRP with six methods in NA and RNA fractions.

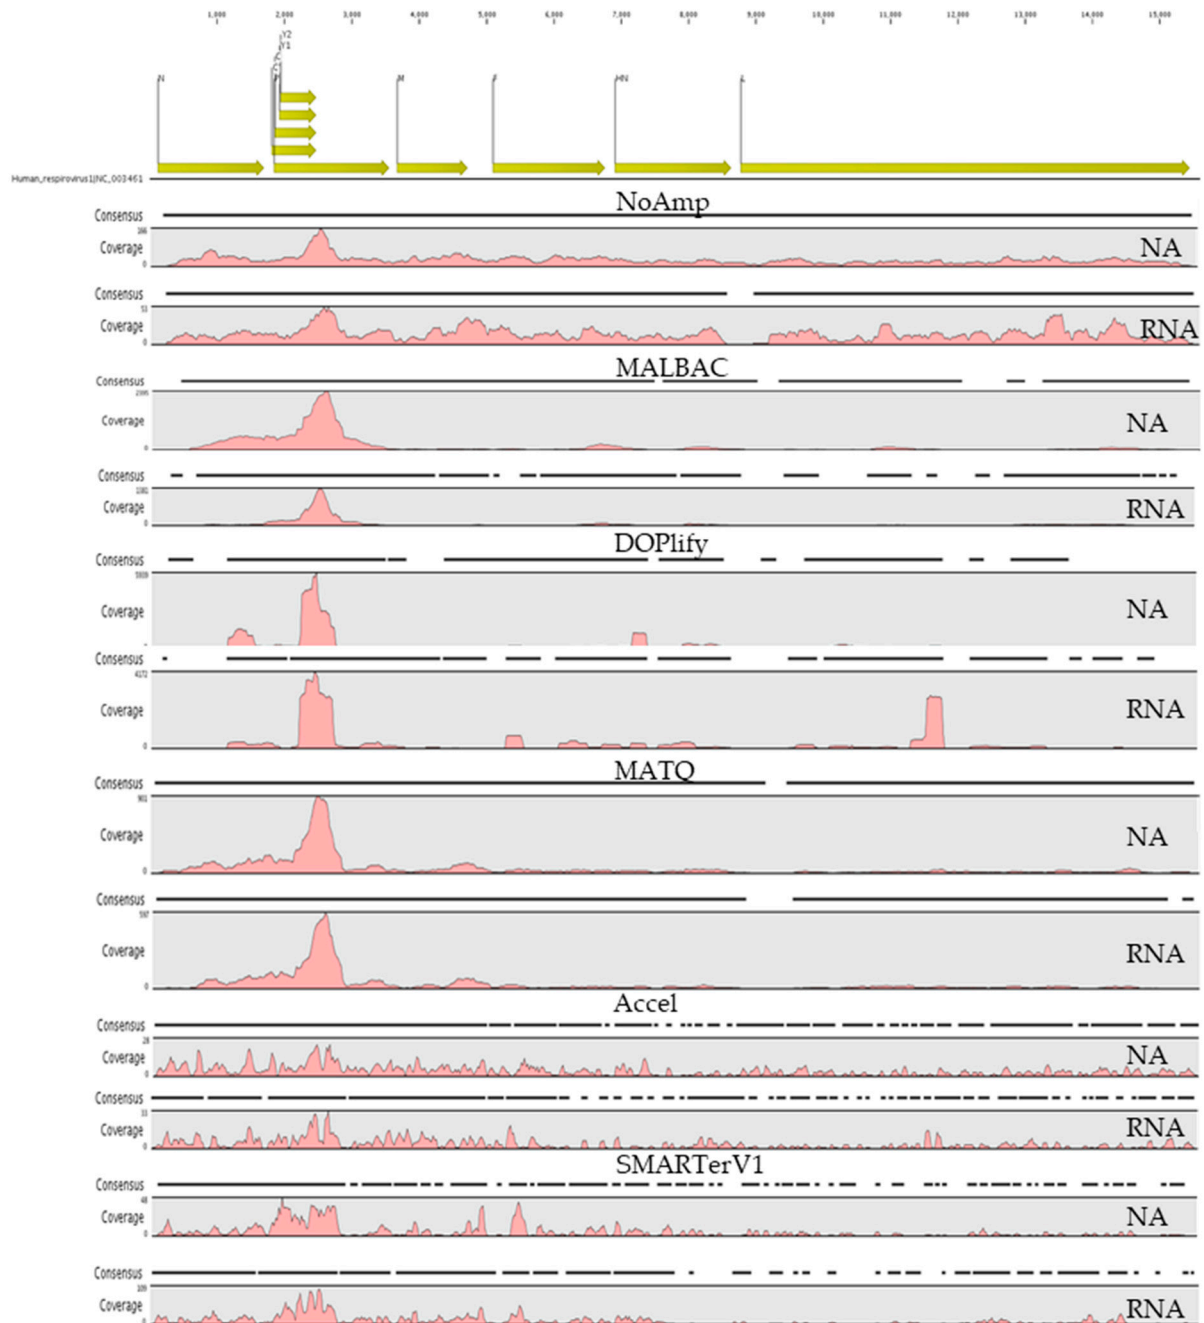

**Figure S5.** Mapping of reads R1 on reference sequence Human parainfluenza virus 1 NC\_003461 from Smarter V1 (A) and NoAmp (B) of the NA fractions.

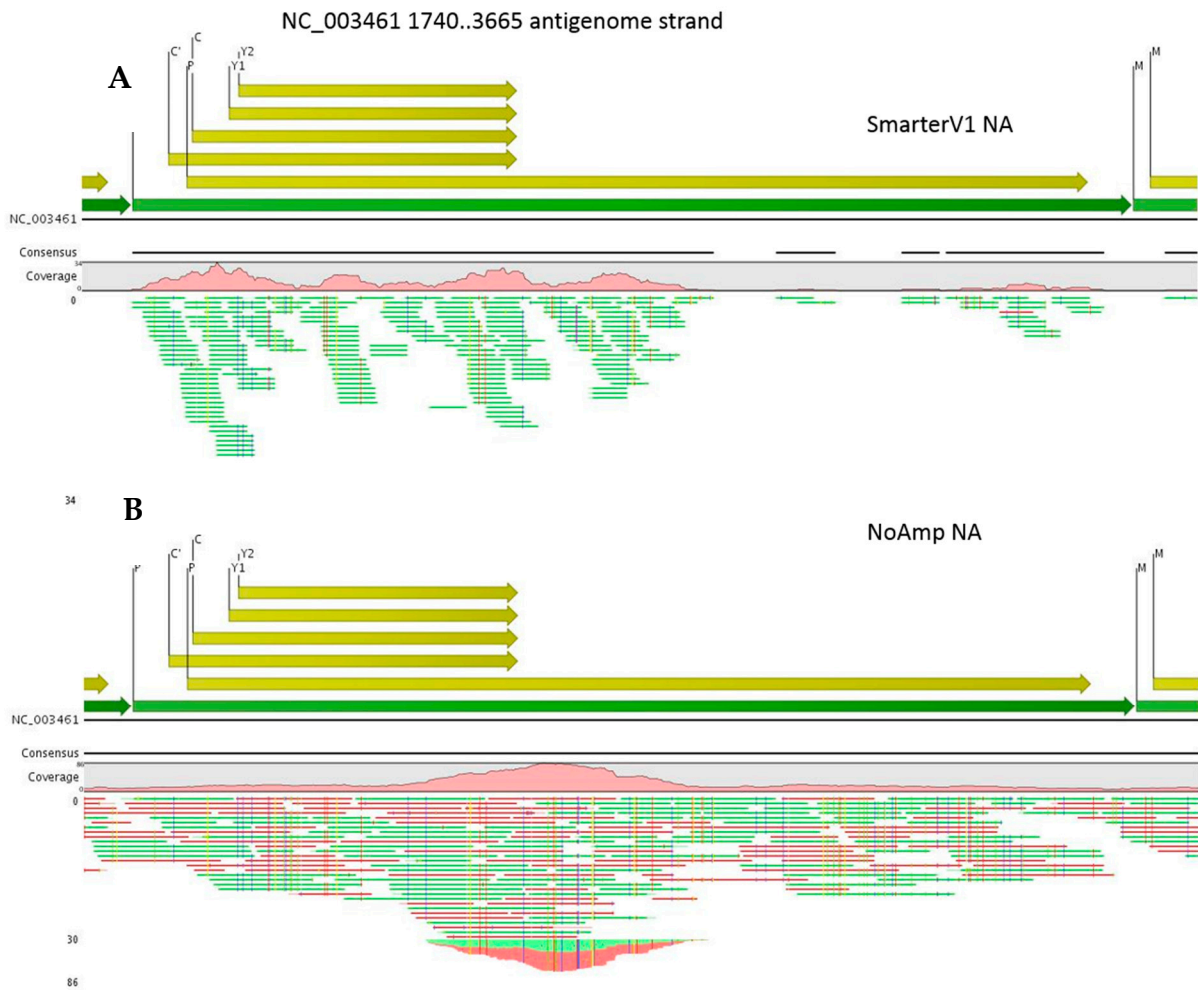

**Figure S6.** Comparison of genome fraction of VMRP spiked in plasma (ratio 1:10) detected in NA (blue) and in RNA (orange) fraction by 100% stacked bar chart.

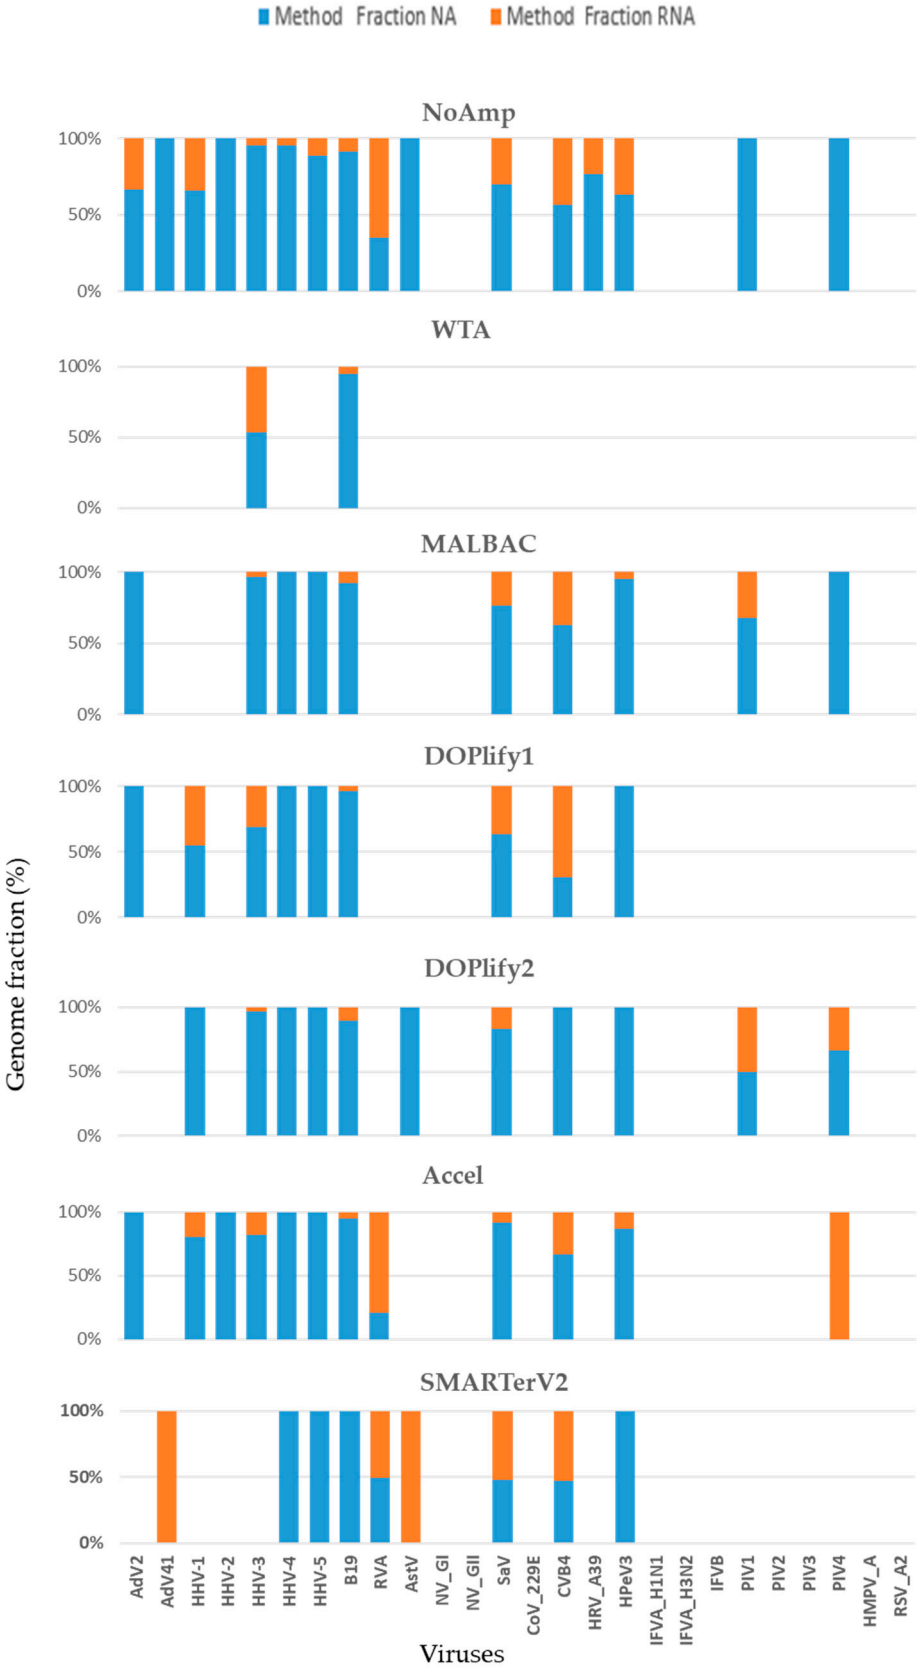

**Figure S7.** Comparison of whole genome coverage profiles of five viruses WFRVS spiked in plasma sample at  $10^4$  genome-copies per mL in NA fraction. For each virus, top profile: MALBAC-RNAV2, bottom profile: NoAmp. Human gammaherpesvirus 4 (HHV-4), porcine circovirus type 1 (PCV1), human orthoreovirus type 1 (REO1), human respiratory syncytial virus strain A2 (HRSV), feline leukemia virus (FeLV), and Squirrel monkey retrovirus (SMRV).

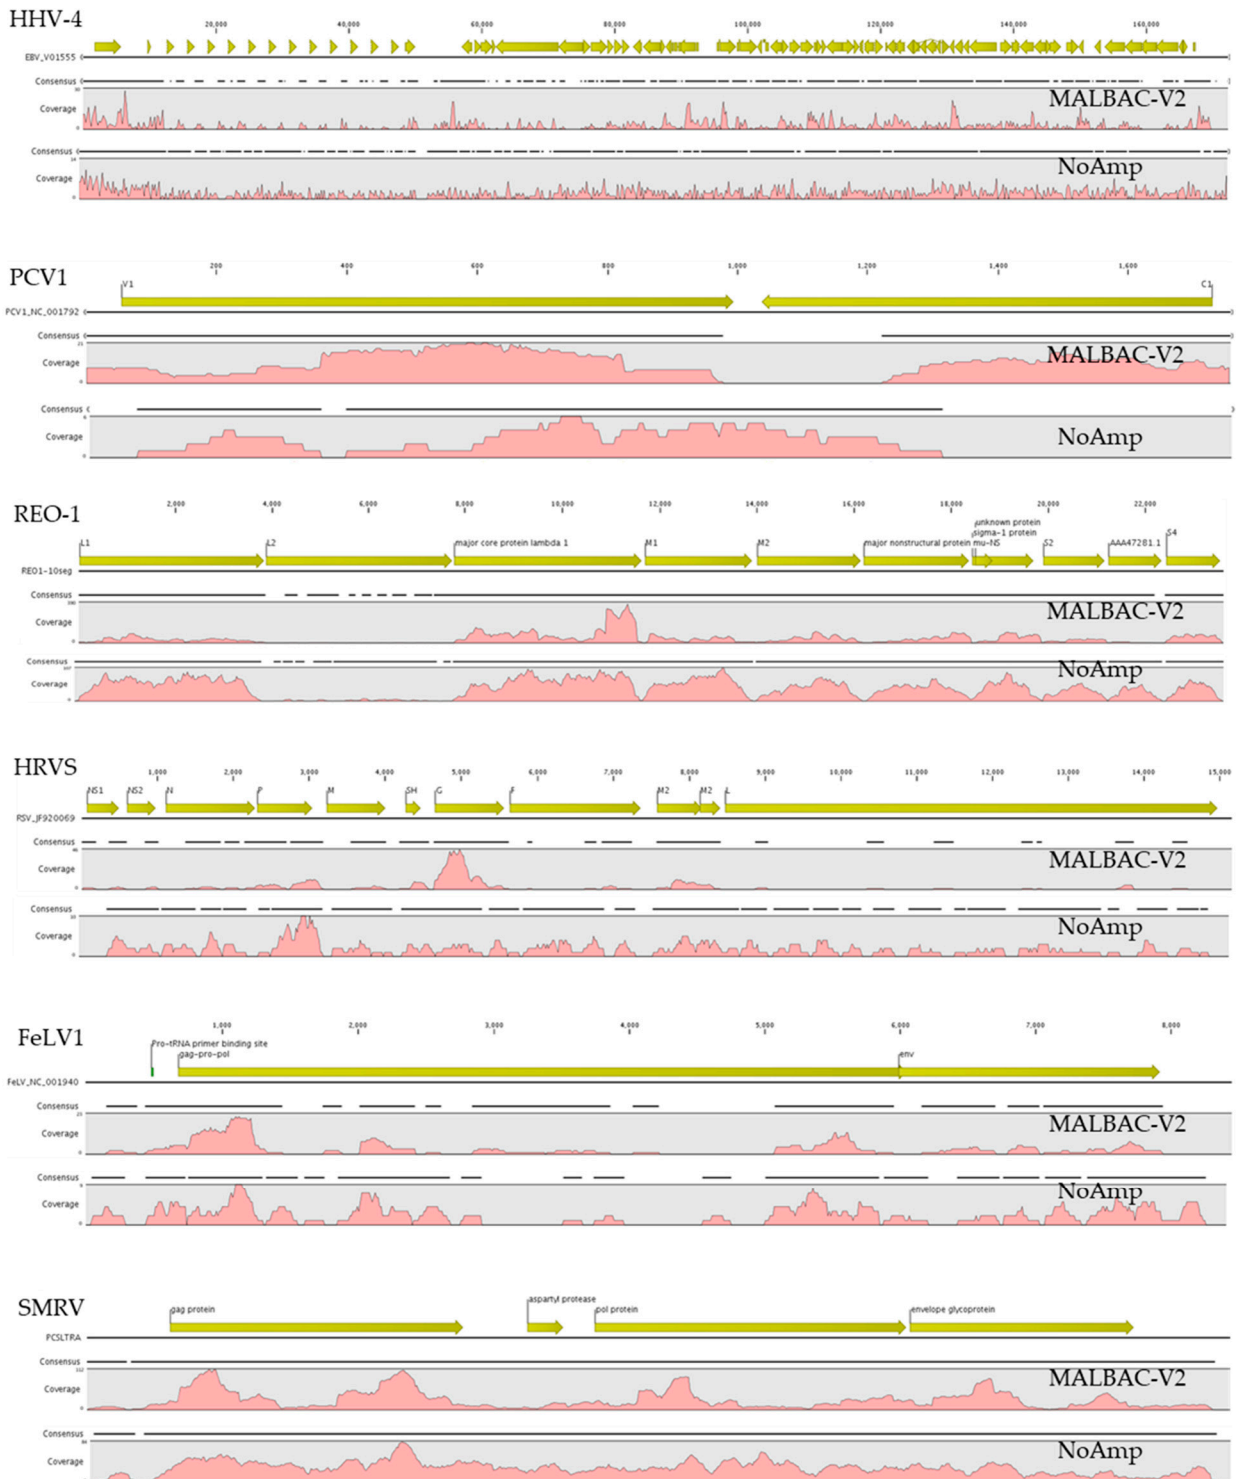

Supplement: viruses-13-00253-s001.pdf [file viruses-13-00253-s001.pdf]
